# Supplementary material for: Sputtering onto liquids: a critical review
Source: publisher site journal article supplement (doi:10.3762/bjnano.13.2), 2022-01-04
Supplement: Additional file 1 [file 2190-4286-13-2-S1.pdf]

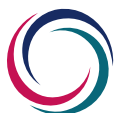

## Supporting Information

for

### **Sputtering onto liquids: a critical review**

Anastasiya Sergievskaya, Adrien Chauvin and Stephanos Konstantinidis

*Beilstein J. Nanotechnol.* **2022**, *13*, 10–53. [doi:10.3762/bjnano.13.2](https://doi.org/10.3762/bjnano.13.2)

### **Sputtering onto liquids: Table with experimental parameters**

## Experimental parameters

**Target:** target material

**Liquid:** host liquid

**Amount of liquid substrate:** volume or weight of the host liquid plus parameters of the vessels

**$d_T$ , cm:** diameter of the target, centimeter

**WD, cm:** working distance, centimeter

**$p$ , Pa:** pressure, Pascal

**$P$ , W:** power, Watt

**$V$ , V:** voltage, volt

**$I$ , mA:** current, milliampere

**$t_s$ , min:** sputter time, minute

**$T_s$ , °C:** temperature, degree Celsius

**$d_{NP}$ , nm:** diameter of nanoparticles according to TEM, nanometer

**Ref.:** reference

## Acronyms

EMIM – 1-ethyl-3-methylimidazolium

TMPA – N,N,N-trimethyl-n-propylammonium

BMIM – 1-butyl-3-methylimidazolium

HyEMIM – 1-(2-hydroxyethyl)-3-methylimidazolium

(BCN)MIM – 1-butyronitril-methylimidazolium

(MeOE)MIM – 1-methoxyethyl-methylimidazolium

(HSE)MIM – 1-thioethyl-methylimidazolium

PP13 – 1-methyl-1-propylpiperidinium

TFSI – bis(trifluoromethanesulfonyl)imide (=NTf<sub>2</sub>)

OTf – trifluoromethanesulfonate

FSA – bis(fluorosulfonyl)amide

OTD – 1-octadecane-thiol

PEMP – pentaerythritol tetrakis(3-mercaptopropionate)

PVP – polyvinylpyrrolidone

PEEL – pentaerythritol ethoxylate

PEG – polyethylene glycol

SMP – 3-mercaptopropionate

MUA – 11-mercaptoundecanoic acid

DES – deep eutectic solvents

**Table S1:** Table with experimental parameters.

| IONIC LIQUID: EMIM – BF <sub>4</sub>  |                        |                                                               |                     |                     |                               |      |          |            |                      |                    |                                                                                                                             |      |
|---------------------------------------|------------------------|---------------------------------------------------------------|---------------------|---------------------|-------------------------------|------|----------|------------|----------------------|--------------------|-----------------------------------------------------------------------------------------------------------------------------|------|
| Target                                | Liquid                 | Amount of liquid substrate                                    | d <sub>t</sub> , cm | WD, cm              | p, Pa                         | P, W | V, V     | I, mA      | t <sub>s</sub> , min | T <sub>s</sub> , C | d <sub>NP</sub> , nm                                                                                                        | Ref. |
| Au                                    | EMIM – BF <sub>4</sub> | 0.60 cm <sup>3</sup> on 20 cm <sup>2</sup> glass plate        | 5                   | 3.5                 | 20 (air)                      | -    | -        | 4.0        | 30                   | RT                 | 5.5±0.86                                                                                                                    | [1]  |
| Au                                    | EMIM – BF <sub>4</sub> | 80 mm <sup>3</sup> on 4 cm <sup>2</sup> glass plate           | 5                   | 3.5                 | 20 (Ar)                       | -    | -        | 10         | 5                    | RT                 | 2.9±0.8                                                                                                                     | [2]  |
| Au                                    | EMIM – BF <sub>4</sub> | 0.60 cm <sup>3</sup> on 10 cm <sup>2</sup> glass plate        | 4.9                 | 2.5                 | 2 (Ar)                        | -    | -        | 10         | 10                   | RT                 | 2.2                                                                                                                         | [3]  |
| W<br>Mo<br>Nb<br>Ti                   | EMIM – BF <sub>4</sub> | 0.60 cm <sup>3</sup> on 10 cm <sup>2</sup> glass slide        | 4.9                 | 2                   | 2 (Ar)                        | -    | -        | 40         | 10                   | RT                 | WO <sub>x</sub> - 3.2 - 4.8<br>MoO <sub>x</sub> - 2.7 - 3.7<br>NbO <sub>x</sub> - 1.9 - 2.9<br>TiO <sub>x</sub> - 3.4 - 4.6 | [4]  |
| In                                    | EMIM – BF <sub>4</sub> | 0.60 cm <sup>3</sup> on 10 cm <sup>2</sup> glass slide        | 4.9                 | 2                   | 2 (Ar)                        | -    | -        | 10         | 10                   | RT                 | In@In <sub>2</sub> O <sub>3</sub> : 8±2                                                                                     | [5]  |
| IONIC LIQUID: TMPA – TFSI             |                        |                                                               |                     |                     |                               |      |          |            |                      |                    |                                                                                                                             |      |
| Target                                | Liquid                 | Amount of liquid substrate                                    | d <sub>t</sub> , cm | WD, cm              | p, Pa                         | P, W | V, V     | I, mA      | t <sub>s</sub> , min | T <sub>s</sub> , C | d <sub>NP</sub> , nm                                                                                                        | Ref. |
| Au                                    | TMPA – TFSI            | 0.6 cm <sup>3</sup> on 20 cm <sup>2</sup> glass plate         | 5                   | 3.5                 | 20 (air)                      | -    | -        | 4.0        | 30                   | RT                 | 1.9±0.46                                                                                                                    | [1]  |
| Au                                    | TMPA – TFSI            | 0.8 cm <sup>3</sup> on 4 cm <sup>2</sup> glass plate          | 5                   | 3.5                 | 20 (Ar)                       | -    | -        | 10         | 5                    | RT                 | 2.2±0.4                                                                                                                     | [2]  |
| Au                                    | TMPA – TFSI            | 0.6 cm <sup>3</sup> on 10 cm <sup>2</sup> glass plate         | 5                   | 3.5                 | 20 (Ar)                       | -    | -        | 40         | 5                    | RT                 | 2.3±0.3                                                                                                                     | [6]  |
| Au<br>Pt                              | TMPA – TFSI            | ? cm <sup>3</sup> on a glass plate 10 cm <sup>2</sup>         | 5                   | 2                   | 10 (Ar)                       | -    | 500      | 40         | 5                    | RT                 | Au: 2.9 ± 0.7<br>Pt: 1.0 ± 0.3                                                                                              | [7]  |
| Pt                                    | TMPA – TFSI            | 0.4 cm <sup>3</sup> on a glass plate (2.5 x 2.5 cm)           | 5.7                 | 4.5                 | 7 (Ar)<br>7 (N <sub>2</sub> ) | -    | -        | 40         | 5                    | RT                 | (Ar): 2.24±0.36<br>(N <sub>2</sub> ): 3.28±0.60                                                                             | [8]  |
| Pt                                    | TMPA – TFSI            | 0.2 cm <sup>3</sup> on a glass plate (2.5 x 2.5 cm)           | 5.7                 | 4.5                 | 7 (Ar)                        | -    | -        | 40         | 5; 15; 30            | RT                 | 2.28; 2.37; 2.27                                                                                                            | [9]  |
| IONIC LIQUIDS: BMIM – BF <sub>4</sub> |                        |                                                               |                     |                     |                               |      |          |            |                      |                    |                                                                                                                             |      |
| Target                                | Liquid                 | Amount of liquid substrate                                    | d <sub>t</sub> , cm | WD, cm              | p, Pa                         | P, W | V, V     | I, mA      | t <sub>s</sub> , min | T <sub>s</sub> , C | d <sub>NP</sub> , nm                                                                                                        | Ref. |
| Au                                    | BMIM – BF <sub>4</sub> | 0.8 cm <sup>3</sup> on a glass plate 4 cm <sup>2</sup>        | 5                   | 3.5                 | 20 (Ar)                       | -    | -        | 10         | 5                    | RT                 | 2.5±0.6                                                                                                                     | [2]  |
| Au                                    | BMIM – BF <sub>4</sub> | 0.6 cm <sup>3</sup> on a glass plate (26mm x 38mm)            | 5                   | 3.0                 | 20 (Ar)                       | -    | -        | 40         | 5                    | RT                 | 2.6 ± 0.4                                                                                                                   | [10] |
| Au                                    | BMIM – BF <sub>4</sub> | 2.0 cm <sup>3</sup> on a stainless plate 15.9 cm <sup>2</sup> | 5                   | 2.5                 | 12-13 (Ar)                    | -    | 1000     | 20         | 50                   | 20 → 80            | (SAXS): 0.6 → 3.5                                                                                                           | [11] |
| Au                                    | BMIM – BF <sub>4</sub> | 2.0 cm <sup>3</sup> on a stainless plate 15.9 cm <sup>2</sup> | 5                   | 2.5;<br>5.0;<br>7.5 | 13-30 (Ar)                    | -    | 700→1000 | 20 →<br>40 | 50                   | 20                 | From 1 to 3                                                                                                                 | [12] |
| Au                                    | BMIM – BF <sub>4</sub> | 1.23 g in a cylindrical glass support (3 cm)                  | 5                   | 5                   | 2.1 (Ar)                      | -    | 335      | 40         | 2.5                  | RT                 | 3.6 ± 0.4                                                                                                                   | [13] |
| In                                    | BMIM – BF <sub>4</sub> | 0.60 cm <sup>3</sup> on 10 cm <sup>2</sup> glass slide        | 4.9                 | 2                   | 2 (Ar)                        | -    | -        | 10         | 10                   | RT                 | In@In <sub>2</sub> O <sub>3</sub> : 9.7±2.0                                                                                 | [5]  |

**Table S1:** Table with experimental parameters.

| Pt                                   | BMIM – BF <sub>4</sub> | 0.4 cm <sup>3</sup> on 6.3 cm <sup>2</sup> glass plate      | 2.5                       | 9.5 (Ar) | -             | -            | 40           | 15            | RT                         | 1.2                      | [3]                        |      |
|--------------------------------------|------------------------|-------------------------------------------------------------|---------------------------|----------|---------------|--------------|--------------|---------------|----------------------------|--------------------------|----------------------------|------|
| IONIC LIQUID: BMIM – PF <sub>6</sub> |                        |                                                             |                           |          |               |              |              |               |                            |                          |                            |      |
| Target                               | Liquid                 | Amount of liquid substrate                                  | <i>d<sub>t</sub></i> , cm | WD, cm   | <i>p</i> , Pa | <i>P</i> , W | <i>V</i> , V | <i>I</i> , mA | <i>t<sub>s</sub></i> , min | <i>T<sub>s</sub></i> , C | <i>d<sub>NP</sub></i> , nm | Ref. |
| Au                                   | BMIM – PF <sub>6</sub> | 1.23 g in a cylindrical glass support (3 cm)                | 5                         | 5        | 2.1 (Ar)      | -            | 335          | 40            | 2.5                        | RT                       | 3.7 ± 0.4                  | [13] |
| Au                                   | BMIM – PF <sub>6</sub> | ? cm <sup>3</sup> on 10 cm <sup>2</sup> glass plate         | 5                         | 3.5      | 20 (Ar)       | -            | -            | 40            | 5                          | RT                       | 2.6 ± 0.3                  | [14] |
| Au                                   | BMIM – PF <sub>6</sub> | 0.6 cm <sup>3</sup> on a glass plate (26mm x 38mm)          | 5                         | 3.0      | 20 (Ar)       | -            | -            | 40            | 5                          | RT                       | 2.3 ± 0.4                  | [10] |
| Au                                   | BMIM – PF <sub>6</sub> | 0.60 cm <sup>3</sup> on 5.7 cm <sup>2</sup> glass slide     | 5                         | 3.5      | 20 (air)      | -            | -            | 40            | 5                          | RT                       | 2.5                        | [15] |
| Au                                   | BMIM – PF <sub>6</sub> | 0.60 cm <sup>3</sup> on 10 cm <sup>2</sup> glass slide      | 5                         | 3.5      | 20 (Ar)       | -            | -            | 40            | 5                          | RT                       | 2.6±0.6                    | [16] |
| Au                                   | BMIM – PF <sub>6</sub> | 1.0 cm <sup>3</sup> on 6.1 cm <sup>2</sup> Teflon plate     | 5                         | 3.5      | 20 (Ar)       | -            | -            | 40            | 5                          | RT                       | Au: 2.6±0.3                | [17] |
| Au                                   | BMIM – PF <sub>6</sub> | 2.0 cm <sup>3</sup> on 15.9 cm <sup>2</sup> stainless plate | 5                         | 2.5      | 12-14 (Ar)    | -            | 1000         | 20            | 50                         | 20 → 80                  | (SAXS): 0.5 → 3            | [18] |
| Au                                   | BMIM – PF <sub>6</sub> | 2.0 cm <sup>3</sup> on 15.9 cm <sup>2</sup> stainless plate | 5                         | 2.5      | 16-19 (Ar)    | -            | 1000         | 20            | 50                         | RT                       | (SAXS): 1.0–1.5            | [19] |
| Ag                                   | BMIM – PF <sub>6</sub> | 0.6 cm <sup>3</sup> on 10 cm <sup>2</sup> glass plate       | 5                         | 8.5      | 5 (Ar)        | -            | -            | 10            | 5→45                       | RT                       | 5.7±1.8                    | [20] |
|                                      |                        |                                                             |                           | 8.5      | 5 (Ar)        |              |              | 40            | 5                          | RT                       | 11                         |      |
| Ag                                   | BMIM – PF <sub>6</sub> | 1.0 cm <sup>3</sup> on 6.1 cm <sup>2</sup> Teflon plate     | 5                         | 3.5      | 20 (Ar)       | -            | -            | 40            | 5                          | RT                       | Ag: 6.0±1.5                | [17] |
| Ag                                   | BMIM – PF <sub>6</sub> | multiple cavity holder (40 μL per cavity)                   | 3.81                      |          | 0.5 (Ar)      | 30           | -            | -             | 15                         | RT                       | 6±3                        | [21] |
| Pd                                   | BMIM – PF <sub>6</sub> | 0.2 cm <sup>3</sup> on 2.5 x 2.5 cm glass plate             | 5.7                       | 4.5      | 8 (Ar)        | -            | -            | 40            | 5                          | RT                       | 3.0                        | [22] |
| IONIC LIQUID: BMIM – TFSI            |                        |                                                             |                           |          |               |              |              |               |                            |                          |                            |      |
| Target                               | Liquid                 | Amount of liquid substrate                                  | <i>d<sub>t</sub></i> , cm | WD, cm   | <i>p</i> , Pa | <i>P</i> , W | <i>V</i> , V | <i>I</i> , mA | <i>t<sub>s</sub></i> , min | <i>T<sub>s</sub></i> , C | <i>d<sub>NP</sub></i> , nm | Ref. |
| Au                                   | BMIM – TFSI            | 0.6 cm <sup>3</sup> on a glass plate (26mm x 38mm)          | 5                         | 3        | 20 (Ar)       | -            | -            | 40            | 5                          | RT                       | 2.0 ± 0.4                  | [10] |
| Au                                   | BMIM – TFSI            | 2.0 cm <sup>3</sup> on 15.9 cm <sup>2</sup> stainless plate | 5                         | 2.5      | 12-14 (Ar)    | -            | 1000         | 20            | 50                         | 20 → 80                  | (SAXS): 0.5 → 3            | [18] |
| Au                                   | BMIM – TFSI            | 1.23 g in a cylindrical glass support (ϕ = 3cm)             | 5                         | 5        | 2.1 (Ar)      | -            | 299          | 20            | 2.5                        | RT                       | 3.2 ± 0.5                  | [13] |
|                                      |                        |                                                             |                           |          |               |              | 322          | 30            | 2.5                        | RT                       | 3.4 ± 0.5                  |      |
|                                      |                        |                                                             |                           |          |               |              | 335          | 40            | 2.5                        | RT                       | 3.5 ± 0.6                  |      |
|                                      |                        |                                                             |                           |          |               |              | 358          | 60            | 2.5                        | RT                       | 3.9 ± 0.8                  |      |
|                                      |                        |                                                             |                           |          |               |              | 410          | 110           | 2.5                        | RT                       | 4.6 ± 0.7                  |      |
|                                      |                        |                                                             |                           |          |               |              | 335          | 40            | 5.0                        | RT                       | 4.0 ± 0.9                  |      |
|                                      |                        |                                                             |                           |          |               |              | 335          | 40            | 7.5                        | RT                       | 3.9 ± 0.8                  |      |
|                                      |                        |                                                             |                           |          |               |              | 335          | 40            | 10                         | RT                       | 4.0 ± 0.8                  |      |
| Au                                   | BMIM – TFSI            | 0.6 cm <sup>3</sup> on 10 cm <sup>2</sup> glass plate       | 5                         | 3.5      | 20 (Ar)       | -            | -            | 40            | 5                          | RT                       | 2.3±0.3                    | [6]  |

**Table S1:** Table with experimental parameters.

| Au                        | BMIM – TFSI                                                                                                                                                                                              | multiple cavity holder<br>(40 $\mu$ L per cavity)                                       | 3.81          |           | 0.5 (Ar)      | 30                 | -                     | -        | 30                  | RT                  | Au: $2.1 \pm 0.7$                                                                                                                                                                       | [23] |
|---------------------------|----------------------------------------------------------------------------------------------------------------------------------------------------------------------------------------------------------|-----------------------------------------------------------------------------------------|---------------|-----------|---------------|--------------------|-----------------------|----------|---------------------|---------------------|-----------------------------------------------------------------------------------------------------------------------------------------------------------------------------------------|------|
| Cu                        | BMIM – TFSI                                                                                                                                                                                              | multiple cavity holder<br>(30 $\mu$ L per cavity)                                       | 3.81          |           | 0.5 (Ar)      | 30                 | -                     | -        | 120                 | RT                  | Cu: $2.8 \pm 1.1$                                                                                                                                                                       | [23] |
| IONIC LIQUID: BMIM – TFSI |                                                                                                                                                                                                          |                                                                                         |               |           |               |                    |                       |          |                     |                     |                                                                                                                                                                                         |      |
| Cu                        | BMIM - TFSI                                                                                                                                                                                              | 50 ml of IL in a petri<br>dish (110 mm inner<br>diameter x 20 mm<br>height) with 30 rpm | 3.81          | 9         | 0.5 (Ar)      | 30                 | 405                   | 75       | 24 hours            | RT                  | $2.6 \pm 1$                                                                                                                                                                             | [24] |
| Pd                        | BMIM – TFSI                                                                                                                                                                                              | 0.2 cm <sup>3</sup> on 2.5 x 2.5 cm<br>glass plate                                      | 5.7           | 4.5       | 8 (Ar)        | -                  | -                     | 40       | 5                   | RT                  | 2.2                                                                                                                                                                                     | [22] |
| Ag                        | BMIM – TFSI                                                                                                                                                                                              | 4.0 cm <sup>3</sup> into a cylindrical<br>ceramic crucible ( $\phi$ =4.5<br>cm)         | 7.5           | 15        | 1.3 (Ar)      | 20                 | -                     | -        |                     | RT                  | 5-20                                                                                                                                                                                    | [25] |
| Ag                        | BMIM – TFSI                                                                                                                                                                                              | multiple cavity holder<br>(40 $\mu$ L per cavity)                                       | 3.81          |           | 0.5 (Ar)      | 30                 | -                     | -        | 15                  | RT                  | $8 \pm 4$                                                                                                                                                                               | [21] |
| OTHER IONIC LIQUIDS       |                                                                                                                                                                                                          |                                                                                         |               |           |               |                    |                       |          |                     |                     |                                                                                                                                                                                         |      |
| Target                    | Liquid                                                                                                                                                                                                   | Amount of liquid<br>substrate                                                           | $d_t$ ,<br>cm | WD,<br>cm | $p$ , Pa      | $P$ , W            | $V$ , V               | $I$ , mA | $t_s$ , min         | $T_s$ , C           | $d_{NP}$ , nm                                                                                                                                                                           | Ref. |
| Au                        | HyEMIM – BF <sub>4</sub><br>OMIM – BF <sub>4</sub><br>HyEMIM – TFSA<br>EMIM – TFSA<br>Ch – TFSA<br>SBMI – TFSA<br>EMIM – EtSO <sub>4</sub><br>EMIM – Ac<br>BMIM – SCN<br>BMIM – actate<br>HyEA – formate | 0.8 cm <sup>3</sup> on a glass plate<br>4 cm <sup>2</sup>                               | 5             | 3.5       | 20 (Ar)       | -                  | -                     | 10       | 5                   | RT                  | $5.1 \pm 0.7$<br>$2.4 \pm 0.8$<br>$4.3 \pm 0.8$<br>$2.9 \pm 0.6$<br>$5.5 \pm 0.7$<br>$2.2 \pm 0.6$<br>$2.5 \pm 0.6$<br>$3.8 \pm 1.3$<br>$2.8 \pm 0.7$<br>$3.0 \pm 0.7$<br>$5.2 \pm 1.3$ | [2]  |
| Au                        | HyEMIM – BF <sub>4</sub>                                                                                                                                                                                 | 0.80 cm <sup>3</sup> on 4.0 cm <sup>2</sup><br>glass plate                              | 5             | 3.5       | 20 (Ar)       | -                  | -                     | 10       | 2.5                 | RT                  | 4.2                                                                                                                                                                                     | [26] |
| Au                        | (BCN)MIM – TFSI                                                                                                                                                                                          | 1.2 g on a Petri plate ( $\phi$<br>=3 cm)                                               | 5             | 5         | 2 (Ar)        | 2 $\rightarrow$ 45 | 275 $\rightarrow$ 410 | -        | 2.5                 | RT                  | 8.7 $\rightarrow$ 5.1                                                                                                                                                                   | [27] |
| Au                        | [PY1,1O1] – BF <sub>4</sub><br>[N122,1O2] – BF <sub>4</sub>                                                                                                                                              | 0.6 cm <sup>3</sup> on a glass plate<br>(26mm x 38mm)                                   | 5             | 3         | 20 (Ar)       | -                  | -                     | 40       | 5                   | RT                  | $2.7 \pm 0.5$<br>$3.5 \pm 0.7$                                                                                                                                                          | [10] |
| Au                        | AMIM – TFSI<br>AMIM – BF <sub>4</sub>                                                                                                                                                                    | Layer of IL on Si(111)                                                                  | -             | -         | 3 (Ar)        | 50                 | -                     | -        | 5 sec               | RT                  | $5.1 \pm 0.8$<br>$6.5 \pm 0.7$                                                                                                                                                          | [28] |
| Au                        | EMIM – EtSO <sub>4</sub>                                                                                                                                                                                 | 1.5 ml on a plate ( $\phi$ =13<br>cm)                                                   | 5.1           | 15.2      | 0.53 (Ar)     | 30 (RF)            | -                     | -        | 9                   | RT                  | $1.3 \pm 0.7$                                                                                                                                                                           | [29] |
| Au                        | C <sub>n</sub> MIM – BF <sub>4</sub> (n=2,4,8)<br>C <sub>n</sub> MIM – OTf (n=2,4,6)<br>BMIM – FSA                                                                                                       | 2.0 cm <sup>3</sup> on 15.9 cm <sup>2</sup><br>stainless plate                          | 5             | 2.5       | 12-14<br>(Ar) | -                  | 1000                  | 20       | 50                  | 20 $\rightarrow$ 80 | (SAXS): 0.5 $\rightarrow$ 3                                                                                                                                                             | [18] |
| Au                        | C <sub>n</sub> MIM – BF <sub>4</sub> (n=2,4,8)                                                                                                                                                           | 1 cm <sup>3</sup> on 6.1 cm <sup>2</sup> Teflon<br>plane                                | 5             | 2.5       | 10-15<br>(Ar) | -                  | 1000                  | 5        | 12 $\rightarrow$ 36 | RT                  | (SAXS): 0.75 $\rightarrow$ 3.5                                                                                                                                                          | [30] |

**Table S1:** Table with experimental parameters.

|                               |                                                                                              |                                                                           |                          |               |              |             |             |              |                           |                         |                                                                                            |              |
|-------------------------------|----------------------------------------------------------------------------------------------|---------------------------------------------------------------------------|--------------------------|---------------|--------------|-------------|-------------|--------------|---------------------------|-------------------------|--------------------------------------------------------------------------------------------|--------------|
| Au                            | BMIM – TFSI<br>BMIM – N(CN) <sub>2</sub><br>BMIM – BF <sub>4</sub><br>BMIM – PF <sub>6</sub> | 3.5 cm <sup>3</sup> in a PTFE container ( $\phi$ =4 cm)                   | 5                        | 4             | 10 (Ar)      | -           | -           | 50           | 1                         | RT                      | <2.5                                                                                       | [31]<br>[32] |
| Au                            | PP13-TFSI                                                                                    | 2.4 ml on a laboratory glass dish                                         | 5                        |               | 3 (Ar)       | -           | -           | 20           | 60                        | RT                      | 2.3±1.0                                                                                    | [33]         |
| Au                            | BMIM – FAP                                                                                   | 1.23 g in a cylindrical glass support (3 cm)                              | 5                        | 5             | 2.1 (Ar)     | -           | 335         | 40           | 2.5                       | RT                      | 4.9 ± 0.9                                                                                  | [13]         |
| OTHER IONIC LIQUIDS           |                                                                                              |                                                                           |                          |               |              |             |             |              |                           |                         |                                                                                            |              |
| Ag                            | BMIM – (Pf) <sub>2</sub> N<br>EMIM – TFSI<br>HMIM – TFSI<br>BuPy – TFSI<br>BmPyr – TFSI      | multiple cavity holder (40 $\mu$ L per cavity)                            | 3.81                     |               | 0.5 (Ar)     | 30          | -           | -            | 15                        | RT                      | 7±4<br>7±3<br>7±3<br>4±3<br>9±8                                                            | [21]         |
| Ag                            | (BCN)MIM – TFSI<br>(MeOE)MIM – TFSI<br>(HSE)MIM – TFSI                                       | 3 g into a Petri dish ( $\phi$ =3 cm)                                     | 5                        | 5             | 2 (Ar)       | -           | 335         | 40           | 2.5                       | RT                      | 5.0 (1.8-14.3)<br>8.2 (4.0-15.5)<br>8.7 (5.9-12.0)                                         | [34]         |
| Pt                            | [Me <sub>3</sub> PrN, Et <sub>3</sub> OctN, MePrPyr, MeBuPyr, EtMelm, AllyEtlm] - TFSI       | 0.4 cm <sup>3</sup> on 2.5 x 2.5 cm glass plate                           |                          | 4.5           | 7 (Ar)       | -           | -           | 40           | 15                        | RT                      | 1.4 - 2.4                                                                                  | [35]         |
| Pt                            | HyEMIM – BF <sub>4</sub>                                                                     | 0.80 cm <sup>3</sup> on 4.0 cm <sup>2</sup> glass plate                   | 5                        | 3.5           | 20 (Ar)      | -           | -           | 10           | 2.5                       | RT                      | 1.0                                                                                        | [26]         |
| Pd                            | (BCN)MIM – TFSI<br>(MeOE)MIM – TFSI<br>(HSE)MIM – TFSI                                       | 3 g into a Petri dish ( $\phi$ =3 cm)                                     | 5                        | 5             | 2 (Ar)       | -           | -           | 80 →<br>320  | 5                         | RT                      | 1.4-4.6<br>1.3-6.4<br>2.4-7.3                                                              | [36]         |
| In                            | AMIM – BF <sub>4</sub><br>AEI-BF <sub>4</sub>                                                | 0.60 cm <sup>3</sup> on 10 cm <sup>2</sup> glass slide                    | 4.9                      | 2             | 2 (Ar)       | -           | -           | 10           | 10                        | RT                      | In@In <sub>2</sub> O <sub>3</sub> :18.2±4.0<br>In@In <sub>2</sub> O <sub>3</sub> :16.8±5.1 | [5]          |
| PEEL                          |                                                                                              |                                                                           |                          |               |              |             |             |              |                           |                         |                                                                                            |              |
| <b>Target</b>                 | <b>Liquid</b>                                                                                | <b>Amount of liquid substrate</b>                                         | <b>d<sub>t</sub>, cm</b> | <b>WD, cm</b> | <b>p, Pa</b> | <b>P, W</b> | <b>V, V</b> | <b>I, mA</b> | <b>t<sub>s</sub>, min</b> | <b>T<sub>s</sub>, C</b> | <b>d<sub>NP</sub>, nm</b>                                                                  | <b>Ref.</b>  |
| Cu                            | PEEL                                                                                         | 7 g on a glass Petri plate ( $\phi$ = 6 cm)                               |                          |               | 2 (Ar)       | -           | -           | 10 →<br>100  | 8 and 60                  | 20                      | 3 →10                                                                                      | [37]         |
| Ti                            | PEEL                                                                                         | 4.0 cm <sup>3</sup> into a cylindrical ceramic crucible ( $\phi$ =4.5 cm) | 5.1                      | 15            | 0.7 (Ar)     | 20          | -           | -            | -                         | -                       | TiO <sub>2</sub> : 30-150                                                                  | [25]         |
| Ti                            | PEEL                                                                                         | 2.5g on a Petri plate (5.7 cm <sup>2</sup> )                              |                          | 6             | 2 (Ar)       | -           | 310-265     | 400          | 60-180                    | -                       | (Ti→TiO <sub>2</sub> ): 2.5-5                                                              | [38]         |
| Au                            | PEEL                                                                                         |                                                                           |                          | 4             | 10 (air)     | -           | -           | 40           | 3                         | RT                      | 2.1±0.7                                                                                    | [39]         |
| Au                            | PEEL                                                                                         | 2.5 ml into a watch glass                                                 | 7.62                     | 13            | 0.5          | Au-20       | -           | 60           | 5                         | RT                      | Au -3                                                                                      | [40]         |
| Ag                            |                                                                                              |                                                                           |                          |               |              | Ag-17       |             | 49           |                           |                         | Ag-16±8                                                                                    |              |
| Cu                            |                                                                                              |                                                                           |                          |               |              | Cu-75       |             | 175          |                           |                         | CuOx – 1.2±0.8                                                                             |              |
| Au                            | PEEL                                                                                         | 2.5 ml into a watch glass that was rotated (5 rpm)                        | 7.62                     | 13            | 0.5          | 17          | -           | 49           | 5                         | RT                      | 2.8                                                                                        | [41]         |
| Cu                            |                                                                                              |                                                                           |                          |               |              | 75          |             | 175          |                           |                         | 1.8 (CuOx)                                                                                 |              |
| PEGs (mostly PEG with MW~600) |                                                                                              |                                                                           |                          |               |              |             |             |              |                           |                         |                                                                                            |              |
| <b>Target</b>                 | <b>Liquid</b>                                                                                | <b>Amount of liquid substrate</b>                                         | <b>d<sub>t</sub>, cm</b> | <b>WD, cm</b> | <b>p, Pa</b> | <b>P, W</b> | <b>V, V</b> | <b>I, mA</b> | <b>t<sub>s</sub>, min</b> | <b>T<sub>s</sub>, C</b> | <b>d<sub>NP</sub>, nm</b>                                                                  | <b>Ref.</b>  |

**Table S1:** Table with experimental parameters.

|                               |                                                    |                                                                       |                             |               |                           |                          |                          |                           |                              |                                                   |                                |             |
|-------------------------------|----------------------------------------------------|-----------------------------------------------------------------------|-----------------------------|---------------|---------------------------|--------------------------|--------------------------|---------------------------|------------------------------|---------------------------------------------------|--------------------------------|-------------|
| Au                            | PEG                                                | 2.0 cm <sup>3</sup> on a stainless plate 15.9 cm <sup>2</sup>         | 2.5                         | 16-19 (Ar)    | -                         | 1000                     | 20                       | 50                        | 20 → 60                      | 2 → 8                                             | [42]                           |             |
| Au<br>Ag                      | PEG (200,400,600)                                  | 2 ml of PEG                                                           | 4.5-6.0                     | 8 (Ar)        | -                         | -                        | 10-60                    | 100-600 sec               |                              | Up to 50                                          | [43]                           |             |
| Au<br>Ag                      | PEG                                                | 10 cm <sup>3</sup> on a Petri plate ( $\phi = 3.0$ cm)                | 5                           | 7.5           | 2 (Ar)                    | -                        | 20<br>34                 | 30                        | 25                           | Au: 5.3±1.6<br>Ag: 5.2±1.7                        | [44]                           |             |
| Cu                            | PEG                                                | 10 cm <sup>3</sup> on a Petri plate ( $\phi = 6.3$ cm)                | 6                           | 2 (Ar)        | -                         | -                        | 50                       | 30                        | 30                           | growth 3.1 → 4.1<br>Cu → CuO                      | [45]                           |             |
| Au                            | PEG                                                | 10 cm <sup>3</sup> on a Petri plate ( $\phi = 6.3$ cm)                | 5                           | 11            | 2 (Ar)                    | -                        | 10<br>20                 | 30                        | 30                           | 2.6 ± 0.8<br>2.7 ± 0.9                            | [46]                           |             |
| PEGs (mostly PEG with MW~600) |                                                    |                                                                       |                             |               |                           |                          |                          |                           |                              |                                                   |                                |             |
| Cu                            | PEG                                                | 10 cm <sup>3</sup> in 6.3cm $\phi$ Petri plate                        | 5                           | 11            | 2 (Ar)                    | -                        | 40<br>50                 | 30                        | 30                           | 1.0± 0.3<br>1.5 ± 0.4                             | [46]                           |             |
| Pt                            | PEG                                                | 10 cm <sup>3</sup> on a Petri plate ( $\phi = 6.3$ cm)                | 5                           | 5             | 2 (Ar)                    | -                        | 5 → 50                   | 30                        | 30                           | 0.9 → 2.7                                         | [47]                           |             |
| Au<br>Pt                      | PEG                                                | 2 ml on a Petri plate                                                 | 5                           | 8 (Ar)        | -                         | -                        | 30                       |                           | RT                           | Au: 6.3<br>Pt: 3.9                                | [48]                           |             |
| Au                            | PEG-600                                            | 2 ml                                                                  | 5                           | 8 (Ar)        | -                         | -                        | 30                       | 1.67→8.33                 | 20                           | About 10 nm                                       | [49]                           |             |
| Ag                            | PEG<br>PEG (+MUA)                                  |                                                                       | 0.5                         | 5             | 2 (Ar)                    | -                        | 30                       | 20                        | RT                           | 7.4±3.6<br>2.2±0.5                                | [50]                           |             |
| Ag                            | PEG (+SMP)                                         | 10 g in a glass petri dish ( $\phi = 6.5$ cm)                         | 5                           | 2 (Ar)        | -                         | -                        | 30                       | 20                        | RT                           | 2.7±0.5                                           | [51]                           |             |
| Au                            | PEG                                                | 10 g in a glass petri dish ( $\phi = 6.5$ cm)                         | 5                           | 2 (Ar)        | -                         | -                        | 20                       | 60                        |                              | 7.4±2.1 without and<br>3.7±0.9 with stirring      | [52]                           |             |
| Au                            | PEG+thiocholine                                    | 10 g in a glass petri dish ( $\phi = 6.5$ cm)                         | 5                           | 2 (Ar)        | -                         | -                        | 30                       | 20                        | 30                           | 1.7 ± 0.6                                         | [53]                           |             |
| Au                            | PEG<br>PEG-SH<br>PEG-S <sub>2</sub> H <sub>2</sub> | 2 ml on a Petri plate ( $\phi = 4$ cm)                                | 5                           | 10 (Ar)       | -                         | 420-430                  | 30                       | 5                         | RT                           | 5.6±1.8<br>4.2±0.8<br>3.6±0.6                     | [54]                           |             |
| Au                            | PEG<br>PEG-SH<br>PEG-NH <sub>2</sub>               | 2 ml on a Petri plate ( $\phi = 4$ cm)                                | 5                           | 10 (Ar)       | -                         | 420-430                  | 30                       | 5                         | RT                           | 5.6±1.9<br>1.5±0.3<br>2.5±0.8                     | [55]                           |             |
| Cu                            | PEG<br>PEG (+MUA)                                  | 7 g                                                                   | 6                           |               | -                         | -                        | 20                       | 60                        | 40                           | 2.6 ± 0.6<br>1.6 ± 0.3                            | [56]                           |             |
| Au<br>Ag                      | PEG (+MUTAB)                                       | 10.152 g of PEG + 0.04 g MUTAB                                        |                             | (Ar)          | -                         | -                        | 20<br>34                 | 15                        |                              | 1.1 ± 0.3<br>1.4 ± 0.4                            | [57]                           |             |
| Au<br>Ag<br>Cu                | PEG (+MUTAB)                                       | 3.384 g PEG + 0.02 g of MUTAB on a Petri plate ( $\phi = 6.3$ cm)     | 5                           | 2 (Ar)        | -                         | -                        | 10                       | 10                        |                              | Au 1.2 ± 0.6<br>Ag 1.3 ± 0.6<br>Cu 1.0 ± 0.3      | [58]                           |             |
| Au                            | PEG<br>PEG (+ $\alpha$ -Thioglycerol)              | 10 cm <sup>3</sup> in 6.5 cm $\phi$ Petri plate (+0.05 g $\alpha$ -T) | 2.5                         | 2 -30 (air)   | -                         | About 200                | 10→30                    | 10→40                     | RT                           | no $\alpha$ -T: 4.7 - 5.5<br>$\alpha$ -T: 2.2-3.2 | [59]                           |             |
| GLYCEROL                      |                                                    |                                                                       |                             |               |                           |                          |                          |                           |                              |                                                   |                                |             |
| <b>Target</b>                 | <b>Liquid</b>                                      | <b>Amount of liquid substrate</b>                                     | <b><math>d_t</math>, cm</b> | <b>WD, cm</b> | <b><math>p</math>, Pa</b> | <b><math>P</math>, W</b> | <b><math>V</math>, V</b> | <b><math>I</math>, mA</b> | <b><math>t_s</math>, min</b> | <b><math>T_s</math>, C</b>                        | <b><math>d_{NP}</math>, nm</b> | <b>Ref.</b> |
| Au                            | Diglycerol (+thiocholine chloride)                 | 12.8 g in 6.5cm $\phi$ Petri plate                                    |                             | 2.5           | 20 (Ar)                   | -                        | -                        | 30                        | 30                           | 25                                                | 6.7±3.2<br>(2.0±0.7)           | [60]        |

**Table S1:** Table with experimental parameters.

| Au             | Diglycerol<br>+SH<br>+NH <sub>2</sub><br>+C(O)OH | 10 g on a Petri plate ( $\phi$<br>= 6cm)                          | 5             | 2 (Ar)    | -                 | -                  | 20                    | 20       | RT               | 6.7±3.2<br>4.6±0.9<br>3.0±0.8<br>2.1±0.8 | [61]                                |             |
|----------------|--------------------------------------------------|-------------------------------------------------------------------|---------------|-----------|-------------------|--------------------|-----------------------|----------|------------------|------------------------------------------|-------------------------------------|-------------|
| Au             | Glycerol                                         |                                                                   | 5.08          | 3.5       | 1.33 (Ar)         | -                  | -                     | 10       | 60, 120          | RT                                       | 3.5 → 6.4                           | [62]        |
| Pd             | Glycerol                                         | 5 ml on a Petri plate ( $\phi$<br>= 4cm)                          | 5             | 4-6 (Ar)  | -                 | -                  | 420-430               | 40       | 5                | 20                                       | Pd=2.4±0.4<br>Pt=1.7±0.3            | [63]        |
| Au             | Glycerol                                         | 3 ml in 4cm $\phi$ Petri<br>plate                                 | 5             | 7 (Ar)    | -                 | -                  | -                     | 40       | 5                | 20                                       | 4-12                                | [64]        |
| GLYCEROL       |                                                  |                                                                   |               |           |                   |                    |                       |          |                  |                                          |                                     |             |
| Au             | Glycerol                                         | 2 ml on a Petri plate ( $\phi$<br>= 4cm)                          | 5             | 7 (Ar)    | -                 | -                  | -                     | 30       | 5                | RT                                       | 3.5 ±1.5<br>3.5 ±2.4                | [65]        |
| Ag             | Glycerol +1% of PVP                              | 3 cm <sup>3</sup> on a Petri plate<br>( $\phi$ = 4cm)             |               |           | 0.06 (Ar)         | -                  | 280 - 305             | 30       | 6                | 5 → 40                                   | 12.8 → 21.2                         | [66]        |
| VEGETABLE OILS |                                                  |                                                                   |               |           |                   |                    |                       |          |                  |                                          |                                     |             |
| Target         | Liquid                                           | Amount of liquid<br>substrate                                     | $d_t$ ,<br>cm | WD,<br>cm | $p$ , Pa          | $P$ , W            | $V$ , V               | $I$ , mA | $t_s$ , min      | $T_s$ , C                                | $d_{NP}$ , nm                       | Ref.        |
| Ag             | Castor oil                                       | 1 cm <sup>3</sup> into a glass<br>support ( $\phi$ =3 cm)         |               | 5         | 2 (Ar)            | 13                 | 320                   | -        | 2.5              | RT                                       | 5.5±1.0                             | [67]        |
|                | Canola oil                                       |                                                                   |               |           |                   | 38                 | 420                   | -        | 2.5              |                                          | 1.4 – 8.1                           |             |
| Au             | Castor oil                                       | 1.15 cm <sup>3</sup> into a glass<br>support ( $\phi$ =3 cm)      |               | 5         | 2 (Ar)            | 13                 | 330<br>330<br>260→450 | -        | 2.5<br>10<br>2.5 | RT                                       | 3.6 ± 1.0<br>3.8 ± 1.1<br>2.4 → 3.7 | [68,69]     |
| Ag             | Castor oil                                       | 5 ml into plastic beaker<br>( $\phi$ =2.8 cm)                     | 5.1           | 20        | 0.067;<br>0.67; 2 | 20;40;60;80        |                       |          | 1                | RT                                       | From 0.4 to 8 nm for<br>primary NPs | [70]        |
| Au             | Castor oil                                       | 4 g into plastic beaker<br>( $\phi$ =2.8 cm)                      | 5.1           | 20        | 0.067;<br>0.67; 2 | 20;40;60;80        |                       |          | 1→10             | RT                                       | 2.4 – 3.2                           | [71]        |
| Au             | Sunflower oil                                    | 2 ml into a glass dish ( $\phi$<br>=5 cm)                         |               | 12        | 43                | -                  | -                     | 41       | 5<br>15<br>30    | RT                                       | 2.9 ± 0.5<br>3.7 ± 0.7<br>3.4 ± 0.7 | [72]        |
| SILICONE OILS  |                                                  |                                                                   |               |           |                   |                    |                       |          |                  |                                          |                                     |             |
| Target         | Liquid                                           | Amount of liquid<br>substrate                                     | $d_t$ ,<br>cm | WD,<br>cm | $p$ , Pa          | $P$ , W            | $V$ , V               | $I$ , mA | $t_s$ , min      | $T_s$ , C                                | $d_{NP}$ , nm                       | Ref.        |
| Ag             | Silicone oil                                     | 3 mm in diameter pure<br>silicone oil drop on a<br>piece of glass | 81            | 6         | 0.2 (Ar)          | 15, 30, 50<br>(RF) | -                     | -        |                  | 17 →<br>100                              | film                                | [73]        |
| Ag             | Silicone oil                                     | 2 mm in diameter pure<br>silicone oil drop on a<br>piece of glass |               | 8         | 0.2 (Ar)          | 50 (RF)            | -                     | -        |                  | RT                                       | film                                | [74]        |
| Ag             | Silicone oils                                    | Running liquid                                                    |               | 8         | 1→30<br>(Ar)      | Ag: 500<br>Fe:1000 | -                     | -        | Up to 240        |                                          | Ag: 5-20                            | [75–<br>77] |
| Al             | Silicone oil                                     | 2 mm in diameter pure<br>silicone oil drop on a<br>piece of glass | 81            | 6         | 0.2 (Ar)          | -                  | -                     | 30       |                  | 18→120                                   | film                                | [78]        |



**Table S1:** Table with experimental parameters.

| Fe                 | Silicone oil                                   | resulting oil substrate with an area of about 25×18 mm <sup>2</sup> thickness of about 0.5 mm | 6          | 9      | 0.8 (Ar)    | 10 → 100 | -       | -        | 0.16→12     | film      | [79]                          |         |
|--------------------|------------------------------------------------|-----------------------------------------------------------------------------------------------|------------|--------|-------------|----------|---------|----------|-------------|-----------|-------------------------------|---------|
| Fe                 | Silicone oil                                   | resulting oil substrate with an area of about 25×18 mm <sup>2</sup> thickness of about 0.5 mm | 6          | 9      | 0.8 (Ar)    | 10→120   | -       | -        | 0.08→12     | film      | [80]                          |         |
| Au                 | silicone oil<br>silicon oil +OTD<br>molten OTD | 1.0 g on a Petri plate ( $\phi$ = 3cm)                                                        |            | 2.5    | 20 (Ar)     | -        | 200     | 30       | 30          | 50        | 4.9±1.4<br>1.9±0.4<br>1.3±0.3 | [81]    |
| PEMP               |                                                |                                                                                               |            |        |             |          |         |          |             |           |                               |         |
| Target             | Liquid                                         | Amount of liquid substrate                                                                    | $d_t$ , cm | WD, cm | $p$ , Pa    | $P$ , W  | $V$ , V | $I$ , mA | $t_s$ , min | $T_s$ , C | $d_{NP}$ , nm                 | Ref.    |
| Cu                 | PEMP                                           | 7g                                                                                            |            |        | 2 (Ar/air)  | -        | -       | 20       | 120         | 25        | 1.1 ± 0.2                     | [82]    |
| Ag                 | PEMP                                           | 7 g on a glass Petri plate ( $\phi$ =6 cm)                                                    |            | 5      | 2 (Ar)      | -        | -       | 50       | 20          | 0 → 100   | 1.8-3.4                       | [83]    |
| Ag                 | PEMP                                           | 13 g on a glass Petri plate ( $\phi$ = 6cm)                                                   |            | 4      | 10 (Ar)     | -        | -       | 30       | 20          | RT        | 2.5                           | [84]    |
| Au                 | PEMP                                           |                                                                                               |            | 4      | 10 (air)    | -        | -       | 40       | 5 -15       | RT        | Less 1 nm                     | [39]    |
| OTHER HOST LIQUIDS |                                                |                                                                                               |            |        |             |          |         |          |             |           |                               |         |
| Target             | Liquid                                         | Amount of liquid substrate                                                                    | $d_t$ , cm | WD, cm | $p$ , Pa    | $P$ , W  | $V$ , V | $I$ , mA | $t_s$ , min | $T_s$ , C | $d_{NP}$ , nm                 | Ref.    |
| Au                 | MTAB                                           | 0.15 g of molten 6-MTAB in a 20 mm vessel                                                     |            | 2.3    | 15 (air)    | -        | -       | 40       | 5 → 20      | 110       | 1.3 ± 0.3                     | [85]    |
| Au                 | DES                                            |                                                                                               | 5.7        | 3.5    | 5 (Ar)      | -        | 450     | 20       | 0.5→5       |           | 5.0 ± 0.5                     | [86–88] |
| Au                 | Liquid crystals 4-pentyl-40-cyanobiphenyl      | 0.3 g in a cylindrical glass container ( $\phi$ =15mm)                                        |            |        | 20 (oxygen) | -        | 1000    | -        | 20          | RT        | 2.9±0.6                       | [89]    |

## References

- (1) Torimoto, T.; Okazaki, K. I.; Kiyama, T.; Hirahara, K.; Tanaka, N.; Kuwabata, S. *Appl. Phys. Lett.* **2006**, *89*, 243117. doi:10.1063/1.2404975
- (2) Sugioka, D.; Kameyama, T.; Kuwabata, S.; Torimoto, T. *Phys. Chem. Chem. Phys.* **2015**, *17*, 13150–13159. doi:10.1039/c5cp01602a
- (3) Torimoto, T.; Ohta, Y.; Enokida, K.; Sugioka, D.; Kameyama, T.; Yamamoto, T.; Shibayama, T.; Yoshii, K.; Tsuda, T.; Kuwabata, S. *J. Mater. Chem. A* **2015**, *3*, 6177–6186. doi:10.1039/C4TA06643J
- (4) Suzuki, T.; Suzuki, S.; Tomita, Y.; Okazaki, K. I.; Shibayama, T.; Kuwabata, S.; Torimoto, T. *Chem. Lett.* **2010**, *39*, 1072–1074. doi:10.1246/cl.2010.1072
- (5) Suzuki, T.; Okazaki, K.; Suzuki, S.; Shibayama, T.; Kuwabata, S.; Torimoto, T. *Chem. Mater.* **2010**, *22*, 5209–5215. doi:10.1021/cm101164r
- (6) Okazaki, K. I.; Kiyama, T.; Suzuki, T.; Kuwabata, S.; Torimoto, T. *Chem. Lett.* **2009**, *38*, 330–331. doi:10.1246/cl.2009.330
- (7) Suzuki, S.; Suzuki, T.; Tomita, Y.; Hirano, M.; Okazaki, K.; Kuwabata, S.; Torimoto, T. *CrystEngComm* **2012**, *14*, 4922. doi:10.1039/c2ce25235j
- (8) Tsuda, T.; KURIHARA, T.; HOSHINO, Y.; KIYAMA, T.; OKAZAKI, K.; TORIMOTO, T.; KUWABATA, S. *Electrochemistry* **2009**, *77*, 693–695. doi:10.5796/electrochemistry.77.693
- (9) Tsuda, T.; Yoshii, K.; Torimoto, T.; Kuwabata, S. *J. Power Sources* **2010**, *195*, 5980–5985. doi:10.1016/j.jpowsour.2009.11.027
- (10) Suzuki, S.; Ohta, Y.; Kurimoto, T.; Kuwabata, S.; Torimoto, T. *Phys. Chem. Chem. Phys.* **2011**, *13*, 13585–13593. doi:10.1039/c1cp20814d
- (11) Hatakeyama, Y.; Takahashi, S.; Nishikawa, K. *J. Phys. Chem. C* **2010**, *114*, 11098–11102. doi:10.1021/jp102763n
- (12) Hatakeyama, Y.; Onishi, K.; Nishikawa, K. *RSC Adv.* **2011**, *1*, 1815–1821. doi:10.1039/c1ra00688f
- (13) Wender, H.; De Oliveira, L. F.; Migowski, P.; Feil, A. F.; Lissner, E.; Pechtl, M. H. G.; Teixeira, S. R.; Dupont, J. *J. Phys. Chem. C* **2010**, *114*, 11764–11768. doi:10.1021/jp102231x
- (14) Khatri, O. P.; Adachi, K.; Murase, K.; Okazaki, K. I.; Torimoto, T.; Tanaka, N.; Kuwabata, S.; Sugimura, H. *Langmuir* **2008**, *24*, 7785–7792. doi:10.1021/la800678m
- (15) Okazaki, K. I.; Sakuma, J.; Yasui, J. I.; Kuwabata, S.; Hirahara, K.; Tanaka, N.; Torimoto, T. *Chem. Lett.* **2011**, *40*, 84–86. doi:10.1246/cl.2011.84
- (16) Kameyama, T.; Ohno, Y.; Kurimoto, T.; Okazaki, K.; Uematsu, T.; Kuwabata, S.; Torimoto, T. *Phys. Chem. Chem. Phys.* **2010**, *12*, 1804–1811. doi:10.1039/B914230D
- (17) Okazaki, K.; Kiyama, T.; Hirahara, K.; Tanaka, N.; Kuwabata, S.; Torimoto, T. *Chem. Commun.* **2008**, No. 6, 691–693. doi:10.1039/B714761A
- (18) Hatakeyama, Y.; Judai, K.; Onishi, K.; Takahashi, S.; Kimura, S.; Nishikawa, K. *Phys. Chem. Chem. Phys.* **2016**, *18*, 2339–2349. doi:10.1039/c5cp04123f
- (19) Iimori, T.; Hatakeyama, Y.; Nishikawa, K.; Kato, M.; Ohta, N. *Chem. Phys. Lett.* **2013**, *586*, 100–103. doi:10.1016/j.cplett.2013.09.010
- (20) SUZUKI, T.; OKAZAKI, K.; KIYAMA, T.; KUWABATA, S.; TORIMOTO, T. *Electrochemistry* **2009**, *77*, 636–638. doi:10.5796/electrochemistry.77.636
- (21) Meyer, H.; Meischein, M.; Ludwig, A. *ACS Comb. Sci.* **2018**, *20*, 243–250. doi:10.1021/acscombsci.8b00017
- (22) Oda, Y.; Hirano, K.; Yoshii, K.; Kuwabata, S.; Torimoto, T.; Miura, M. *Chem. Lett.* **2010**, *39*, 1069–1071. doi:10.1246/cl.2010.1069
- (23) Meischein, M.; Garzón-Manjón, A.; Frohn, T.; Meyer, H.; Salomon, S.; Scheu, C.; Ludwig, A. *ACS Comb. Sci.* **2019**. doi:10.1021/acscombsci.9b00140
- (24) Meischein, M.; Ludwig, A. *J. Nanoparticle Res.* **2021**, *23*, 1–15. doi:10.1007/s11051-021-05248-8
- (25) Carette, X.; Debièvre, B.; Cornil, D.; Cornil, J.; Leclère, P.; Maes, B.; Gautier, N.; Gautron, E.; El Mel, A. A.; Raquez, J. M.; Konstantinidis, S. *J. Phys. Chem. C* **2018**, *122*, 26605–26612. doi:10.1021/acs.jpcc.8b06987

- (26) Sugioka, D.; Kameyama, T.; Kuwabata, S.; Yamamoto, T.; Torimoto, T. *ACS Appl. Mater. Interfaces* **2016**, *8*, 10874–10883. doi:10.1021/acsami.6b01978
- (27) Wender, H.; Teixeira, S. R.; Migowski, P.; Feil, A. F.; Dupont, J.; Prechtel, M. H. G.; Machado, G.; de Oliveira, L. F.; Leal, R. *Phys. Chem. Chem. Phys.* **2011**, *13*, 13552. doi:10.1039/c1cp21406c
- (28) Calabria, L.; Fernandes, J. A.; Migowski, P.; Bernardi, F.; Baptista, D. L.; Leal, R.; Grehl, T.; Dupont, J. *Nanoscale* **2017**, *9*, 18753–18758. doi:10.1039/C7NR06167F
- (29) Hamm, S. C.; Basuray, S.; Mukherjee, S.; Sengupta, S.; Mathai, J. C.; Baker, G. A.; Gangopadhyay, S. *J. Mater. Chem. A* **2014**, *2*, 792–803. doi:10.1039/C3TA13431H
- (30) Hatakeyama, Y.; Okamoto, M.; Torimoto, T.; Kuwabata, S.; Nishikawa, K. *J. Phys. Chem. C* **2009**, *113*, 3917–3922. doi:10.1021/jp807046u
- (31) Vanecht, E.; Binnemans, K.; Patskovsky, S.; Meunier, M.; Seo, J. W.; Stappers, L.; Franssaer, J. *Phys. Chem. Chem. Phys.* **2012**, *14*, 5662. doi:10.1039/c2cp23677j
- (32) Vanecht, E.; Binnemans, K.; Seo, J. W.; Stappers, L.; Franssaer, J. *Phys. Chem. Chem. Phys.* **2011**, *13*, 13565–13571. doi:10.1039/c1cp20552h
- (33) Yoda, M.; Takashima, T.; Akiyoshi, K.; Torimoto, T.; Irie, H. *J. Chem. Phys.* **2020**, *153*, 014701. doi:10.1063/5.0010100
- (34) Qadir, M. I.; Kauling, A.; Calabria, L.; Grehl, T.; Dupont, J. *Nano-Structures and Nano-Objects* **2018**, *14*, 92–97. doi:10.1016/j.nanoso.2018.01.015
- (35) Yoshii, K.; Tsuda, T.; Arimura, T.; Imanishi, A.; Torimoto, T.; Kuwabata, S. *RSC Adv.* **2012**, *2*, 8262–8264. doi:10.1039/c2ra21243a
- (36) Qadir, M. I.; Kauling, A.; Ebeling, G.; Fartmann, M.; Grehl, T.; Dupont, J. *Aust. J. Chem.* **2019**, *72*, 49. doi:10.1071/CH18183
- (37) Nakagawa, K.; Narushima, T.; Udagawa, S.; Yonezawa, T. *J. Phys. Conf. Ser.* **2013**, *417*. doi:10.1088/1742-6596/417/1/012038
- (38) Porta, M.; Nguyen, M. T.; Yonezawa, T.; Tokunaga, T.; Ishida, Y.; Tsukamoto, H.; Shishino, Y.; Hatakeyama, Y. *New J. Chem.* **2016**, *40*, 9337–9343. doi:10.1039/c6nj01624c
- (39) Shishino, Y.; Yonezawa, T.; Udagawa, S.; Hase, K.; Nishihara, H. *Angew. Chemie* **2011**, *123*, 729–731. doi:10.1002/ange.201005723
- (40) Chauvin, A.; Sergievskaya, A.; Fucikova, A.; Antunes Corrêa, C.; Veselý, J.; Cornil, J.; Cornil, D.; Dopita, M.; Konstantinidis, S. *Nanoscale Adv.* **2021**. doi:10.1039/D1NA00222H
- (41) Chauvin, A.; Sergievskaya, A.; El Mel, A.-A.; Fucikova, A.; Antunes Corrêa, C.; Vesely, J.; Duverger-Nédellec, E.; Cornil, D.; Cornil, J.; Tessier, P.-Y.; Dopita, M.; Konstantinidis, S. *Nanotechnology* **2020**, *31*, 455303. doi:10.1088/1361-6528/abaa75
- (42) Hatakeyama, Y.; Morita, T.; Takahashi, S.; Onishi, K.; Nishikawa, K. *J. Phys. Chem. C* **2011**, *115*, 3279–3285. doi:10.1021/jp110455k
- (43) Slepíčka, P.; Elashnikov, R.; Ulbrich, P.; Staszek, M.; Kolská, Z.; Švorčík, V. *J. Nanoparticle Res.* **2015**, *17*. doi:10.1007/s11051-014-2850-z
- (44) Nguyen, M. T.; Yonezawa, T.; Wang, Y.; Tokunaga, T. *Mater. Lett.* **2016**, *171*, 75–78. doi:10.1016/j.matlet.2016.02.047
- (45) Chau, Y. R.; Deng, L.; Nguyen, M. T.; Yonezawa, T. *MRS Adv.* **2019**, *4*, 305–309. doi:10.1557/adv.2019.55
- (46) Nguyen, M. T.; Zhang, H.; Deng, L.; Tokunaga, T.; Yonezawa, T. *Langmuir* **2017**, *33*, 12389–12397. doi:10.1021/acs.langmuir.7b03194
- (47) Deng, L.; Nguyen, M. T.; Yonezawa, T. *Langmuir* **2018**, *34*, 2876–2881. doi:10.1021/acs.langmuir.7b04274
- (48) Pišlová, M.; Kalbáčová, M. H.; Vrabcová, L.; Slepíčka, P.; Kolská, Z.; Švorčík, V. *Dig. J. Nanomater. Biostructures* **2018**, *13*, 1035–1044
- (49) Fajstavr, D.; Karasová, A.; Michalcová, A.; Ulbrich, P.; Kasálková, N. S.; Siegel, J.; Švorčík, V.; Slepíčka, P. *Nanomaterials* **2021**, *11*, 1–17. doi:10.3390/nano11061434
- (50) Ishida, Y.; Nakabayashi, R.; Matsubara, M.; Yonezawa, T. *New J. Chem.* **2015**, *39*, 4227–4230. doi:10.1039/c5nj00294j
- (51) Ishida, Y.; Nakabayashi, R.; Corpuz, R. D.; Yonezawa, T. *Colloids Surfaces A Physicochem. Eng. Asp.* **2017**, *518*, 25–29. doi:10.1016/j.colsurfa.2017.01.022

- (52) Ishida, Y.; Akita, I.; Sumi, T.; Matsubara, M.; Yonezawa, T. *Sci. Rep.* **2016**, *6*, 1–14. doi:10.1038/srep29928
- (53) Ishida, Y.; Morita, A.; Tokunaga, T.; Yonezawa, T. *Langmuir* **2018**, *34*, 4024–4030. doi:10.1021/acs.langmuir.8b00067
- (54) Rezníčková, A.; Slepicka, P.; Slavikova, N.; Staszek, M.; Svorcik, V. *Colloids Surfaces A Physicochem. Eng. Asp.* **2017**, *523*, 91–97. doi:10.1016/j.colsurfa.2017.04.005
- (55) Rezníčková, A.; Slavikova, N.; Kolska, Z.; Kolarova, K.; Belinova, T.; Hubalek Kalbacova, M.; Cieslar, M.; Svorcik, V. *Colloids Surfaces A Physicochem. Eng. Asp.* **2019**, *560*, 26–34. doi:10.1016/j.colsurfa.2018.09.083
- (56) Porta, M.; Nguyen, M. T.; Ishida, Y.; Yonezawa, T. *RSC Adv.* **2016**, *6*, 105030–105034. doi:10.1039/c6ra17291a
- (57) Corpuz, R. D.; Ishida, Y.; Nguyen, M. T.; Yonezawa, T. *Langmuir* **2017**, *33*, 9144–9150. doi:10.1021/acs.langmuir.7b02011
- (58) Corpuz, R. D.; Ishida, Y.; Yonezawa, T. *New J. Chem.* **2017**, *41*, 6828–6833. doi:10.1039/c7nj01369h
- (59) Sumi, T.; Motono, S.; Ishida, Y.; Shirahata, N.; Yonezawa, T. *Langmuir* **2015**, *31*, 4323–4329. doi:10.1021/acs.langmuir.5b00294
- (60) Ishida, Y.; Lee, C.; Yonezawa, T. *Sci. Rep.* **2015**, *5*, 8–13. doi:10.1038/srep15372
- (61) Akita, I.; Ishida, Y.; Yonezawa, T. *Bull. Chem. Soc. Jpn.* **2016**, *89*, 1054–1056. doi:10.1246/bcsj.20160187
- (62) Lee, S. H.; Jung, H. K.; Kim, T. C.; Kim, C. H.; Shin, C. H.; Yoon, T.-S.; Hong, A.-R.; Jang, H. S.; Kim, D. H. *Appl. Surf. Sci.* **2018**, *434*, 1001–1006. doi:10.1016/j.apsusc.2017.11.008
- (63) Staszek, M.; Siegel, J.; Kolářová, K.; Rimpelová, S.; Švorčík, V. *Micro Nano Lett.* **2014**, *9*, 778–781. doi:10.1049/mnl.2014.0345
- (64) Siegel, J.; Kolářová, K.; Vosmanská, V.; Rimpelová, S.; Leitner, J.; Švorčík, V. *Mater. Lett.* **2013**, *113*, 59–62. doi:10.1016/j.matlet.2013.09.047
- (65) Siegel, J.; Kvítek, O.; Ulbrich, P.; Kolská, Z.; Slepíčka, P.; Švorčík, V. *Mater. Lett.* **2012**, *89*, 47–50. doi:10.1016/j.matlet.2012.08.048
- (66) Staszek, M.; Siegel, J.; Polívková, M.; Švorčík, V. *Mater. Lett.* **2017**, *186*, 341–344. doi:10.1016/j.matlet.2016.10.036
- (67) Wender, H.; Gonçalves, R. V.; Feil, A. F.; Migowski, P.; Poletto, F. S.; Pohlmann, A. R.; Dupont, J.; Teixeira, S. R. *J. Phys. Chem. C* **2011**, *115*, 16362–16367. doi:10.1021/jp205390d
- (68) Wender, H.; De Oliveira, L. F.; Feil, A. F.; Lissner, E.; Migowski, P.; Meneghetti, M. R.; Teixeira, S. R.; Dupont, J. *Chem. Commun.* **2010**, *46*, 7019–7021. doi:10.1039/c0cc01353f
- (69) Castro, H. P. S.; Wender, H.; Alencar, M. A. R. C.; Teixeira, S. R.; Dupont, J.; Hickmann, J. M. *J. Appl. Phys.* **2013**, *114*, 183104. doi:10.1063/1.4831679
- (70) Sergievskaya, A.; O'Reilly, A.; Chauvin, A.; Veselý, J.; Panepinto, A.; De Winter, J.; Cornil, D.; Cornil, J.; Konstantinidis, S. *Colloids Surfaces A Physicochem. Eng. Asp.* **2021**, *615*, 126286. doi:10.1016/j.colsurfa.2021.126286
- (71) Sergievskaya, A.; O'Reilly, A.; Alem, H.; De Winter, J.; Cornil, D.; Cornil, J.; Konstantinidis, S. *Front. Nanotechnol.* **2021**, *3*. doi:10.3389/fnano.2021.710612
- (72) Michels, F. S.; Gonçalves, P. J.; Nascimento, V. A.; Oliveira, S. L.; Wender, H.; Caires, A. R. L. *Nanomaterials* **2021**, *11*, 1668. doi:10.3390/nano11071668
- (73) Feng, C.-M.; Ge, H. L.; Tong, M.-R.; Ye, G. X.; Jiao, Z.-K. *Thin Solid Films* **1999**, *342*, 30–34. doi:10.1016/S0040-6090(98)01151-1
- (74) Ye, G. X.; Feng, C. M.; Zhang, Q. R.; Ge, H. L.; Zhang, X. J. *Chinese Phys. Lett.* **1996**, *13*, 772–774. doi:10.1088/0256-307X/13/10/016
- (75) Wagener, M.; Günther, B. High Pressure DC-Magnetron Sputtering on Liquids: A New Process for the Production of Metal Nanosuspensions. In *Structure, Dynamics and Properties of Disperse Colloidal Systems*; Steinkopff: Darmstadt, 1998; Vol. 111, pp 78–81
- (76) Wagener, M.; Murty, B. S.; Günther, B. *MRS Proc.* **1996**, *457*, 149. doi:10.1557/PROC-457-149

- (77) Wagener, M.; Günther, B. *J. Magn. Magn. Mater.* **1999**, *201*, 41–44. doi:10.1016/S0304-8853(99)00055-4
- (78) Ge, H. L.; Feng, C.; Ye, G. X.; Ren, Y.; Jiao, Z. *J. Appl. Phys.* **1997**, *82*, 5469–5471. doi:10.1063/1.365574
- (79) Zhang, Y. J.; Yu, S. J. *Int. J. Mod. Phys. B* **2009**, *23*, 3147–3157. doi:10.1142/S0217979209049772
- (80) YU, S.-J.; Zhang, Y. J.; CHEN, J.-X.; Ge, H. L. *Surf. Rev. Lett.* **2006**, *13*, 779–784. doi:10.1142/S0218625X06008840
- (81) Ishida, Y.; Sumi, T.; Yonezawa, T. *New J. Chem.* **2015**, *39*, 5895–5897. doi:10.1039/c5nj01011j
- (82) Porta, M.; Nguyen, M. T.; Tokunaga, T.; Ishida, Y.; Liu, W.-R.; Yonezawa, T. *Langmuir* **2016**, *32*, 12159–12165. doi:10.1021/acs.langmuir.6b03017
- (83) Ishida, Y.; Udagawa, S.; Yonezawa, T. *Colloids Surfaces A Physicochem. Eng. Asp.* **2016**, *498*, 106–111. doi:10.1016/j.colsurfa.2016.03.044
- (84) Ishida, Y.; Udagawa, S.; Yonezawa, T. *Colloids Surfaces A Physicochem. Eng. Asp.* **2016**, *504*, 437–441. doi:10.1016/j.colsurfa.2016.05.035
- (85) Shishino, Y.; Yonezawa, T.; Kawai, K.; Nishihara, H. *Chem. Commun.* **2010**, *46*, 7211. doi:10.1039/c0cc01702g
- (86) Raghuwanshi, V. S.; Ochmann, M.; Hoell, A.; Polzer, F.; Rademann, K. *Langmuir* **2014**, *30*, 6038–6046. doi:10.1021/la500979p
- (87) Raghuwanshi, V. S.; Ochmann, M.; Polzer, F.; Hoell, A.; Rademann, K. *Chem. Commun.* **2014**, *50*, 8693–8696. doi:10.1039/c4cc02588a
- (88) O'Neill, M.; Raghuwanshi, V. S.; Wendt, R.; Wollgarten, M.; Hoell, A.; Rademann, K. *Zeitschrift für Phys. Chemie* **2015**, *229*, 221–234. doi:10.1515/zpch-2014-0644
- (89) Yoshida, H.; Kawamoto, K.; Kubo, H.; Tsuda, T.; Fujii, A.; Kuwabata, S.; Ozaki, M. *Adv. Mater.* **2010**, *22*, 622–626. doi:10.1002/adma.200902831
