# Supplementary material for: Sputtering onto liquids: a critical review
Source: publisher site journal article supplement (doi:10.3762/bjnano.13.2), 2022-01-04
Supplement: Additional file 2 [file 2190-4286-13-2-S2.pdf]

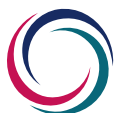

## Supporting Information

for

### **Sputtering onto liquids: a critical review**

Anastasiya Sergievskaya, Adrien Chauvin and Stephanos Konstantinidis

*Beilstein J. Nanotechnol.* **2022**, *13*, 10–53. [doi:10.3762/bjnano.13.2](https://doi.org/10.3762/bjnano.13.2)

### **Comparison the sizes of the metal NPs prepared by magnetron sputtering onto similar host liquids**

Depositions were done in the sputter coaters with 2-inch metal targets, at temperatures of 20–25 °C. Parameters:  $p$  – pressure (Pa),  $WD$  – working distance (mm),  $V$  – voltage (V),  $I$  – current (mA),  $t_s$  – duration of deposition (min), NP size – diameter of NPs determined by TEM (nm).

**Table S1:** Sputtering onto ionic liquid TMPA-TFSI.

| Target           | Amount of liquid substrate                                    | $p$ , Pa | $WD$ , mm | $V$ , V | $I$ , mA | $t_s$ , min | NP size (nm)                        | Ref. |
|------------------|---------------------------------------------------------------|----------|-----------|---------|----------|-------------|-------------------------------------|------|
| Pt               | 0.4 cm <sup>3</sup> of IL on a glass plate (2.5 x 2.5 cm)     | 7        | 45        |         | 40       | 5           | 2.24±0.36                           | [1]  |
| Pt               | 0.2 cm <sup>3</sup> of IL on a glass plate (2.5 x 2.5 cm)     | 7        | 45        |         | 40       | 5 → 30      | 2.3-2.4                             | [2]  |
| Pt<br>AuPt<br>Au | IL was spread on a glass plate 10 cm <sup>2</sup>             | 10       | 20        | 500     | 40       | 5           | 1.0 ± 0.3<br>1.5 ± 0.4<br>2.9 ± 0.7 | [3]  |
| Au               | 0.8 cm <sup>3</sup> of IL on a glass plate 4 cm <sup>2</sup>  | 20       | 35        |         | 10       | 5           | 2.2±0.4                             | [4]  |
| Au               | 0.6 cm <sup>3</sup> of IL on a glass plate 10 cm <sup>2</sup> | 20       | 35        |         | 40       | 5           | 2.3±0.3                             | [5]  |

**Table S2:** Sputtering onto ionic liquid BMIM-PF<sub>6</sub>.

| Target | Amount of liquid substrate                                          | $p$ , Pa | $WD$ , mm | $P$ , W | $V$ , V | $I$ , mA | $t_s$ , min | NP size (nm) | Ref. |
|--------|---------------------------------------------------------------------|----------|-----------|---------|---------|----------|-------------|--------------|------|
| Au     | 0.6 cm <sup>3</sup> of IL on a glass plate 10 cm <sup>2</sup>       | 20       | 35        |         |         | 40       | 5           | 2.6 ± 0.3    | [6]  |
| Au     | 0.6 cm <sup>3</sup> of IL on a glass (26 x 38x 1mm3)                | 20       | 30        |         |         | 40       | 5           | 2.3 ± 0.4    | [7]  |
| Au     | 0.60 cm <sup>3</sup> of IL on a glass slide (5.7 cm <sup>2</sup> )  | 20       | 35        |         |         | 40       | 5           | 2.5          | [8]  |
| Au     | 0.60 cm <sup>3</sup> of IL on a glass slide (10 cm <sup>2</sup> )   | 20       | 35        |         |         | 40       | 5           | 2.6±0.6      | [9]  |
| Au     | 2.0 cm <sup>3</sup> of IL on a stainless plate 15.9 cm <sup>2</sup> | 16-19    | 25        |         | 1000    | 20       | 50          | 1.0–1.5      | [10] |
| Au     | 1.0 cm <sup>3</sup> of IL on a Teflon plate 6.1 cm <sup>2</sup>     | 20       | 35        |         |         | 40       | 5           | 2.6±0.3      | [11] |
| Ag     | 1.0 cm <sup>3</sup> of IL on a Teflon plate 6.1 cm <sup>2</sup>     | 20       | 35        |         |         | 40       | 5           | 6±1.5        | [11] |
| Ag     | multiple cavity holder (40 $\mu$ L per cavity)                      | 0.5      |           | 30      |         |          | 15          | 6±3          | [12] |
| Ag     | 0.6 cm <sup>3</sup> of IL on a glass plate 10 cm <sup>2</sup>       | 5        | 85        |         |         | 10       | 5           | 5.7±1.8      | [13] |
|        |                                                                     | 5        | 85        |         |         | 40       | 5           | 11           |      |
| Pd     | 0.2 cm <sup>3</sup> of IL on a glass plate (2.5 x 2.5 cm)           | 8        | 45        |         |         | 40       | 5           | 3.0          | [14] |

**Table S3:** Sputtering onto ionic liquid BMIM-TFSI.

| Target | Amount of liquid substrate                                                    | $p$ , Pa | $WD$ , mm | $P$ , W | $V$ , V | $I$ , mA | $t_s$ , min | NP size (nm) | Ref. |
|--------|-------------------------------------------------------------------------------|----------|-----------|---------|---------|----------|-------------|--------------|------|
| Pd     | 0.2 cm <sup>3</sup> of IL on a glass plate (2.5 x 2.5 cm)                     | 8        | 45        |         |         | 40       | 5           | 2.2          | [14] |
| Au     | 0.6 cm <sup>3</sup> of IL on a glass (26 x 38x 1 mm3)                         | 20       | 30        |         |         | 40       | 5           | 2.0 ± 0.4    | [7]  |
| Au     | 3.5 cm <sup>3</sup> of IL was poured in a PTFE container ( $\phi$ =4 cm)      | 10       | 40        |         |         | 50       | 1           | 5-6          | [15] |
| Ag     | multiple cavity holder (40 $\mu$ L per cavity)                                | 0.5      |           | 30      |         |          | 15          | 8±4          | [12] |
| Ag     | 4 cm <sup>3</sup> of IL into a cylindrical ceramic crucible ( $\phi$ =4.5 cm) | 1.3      | 150       | 20      |         |          | 20          | 5-20         | [16] |

**Table S4:** Sputtering onto pure PEG-600.

| Target | Amount of liquid substrate             | $p$ , Pa | $WD$ , mm | $V$ , V | $I$ , mA | $t_s$ , min | NP size (nm) | Ref. |
|--------|----------------------------------------|----------|-----------|---------|----------|-------------|--------------|------|
| Pt     | 2 ml on a Petri plate                  | 8        | 50        |         | 30       |             | 3.9          | [17] |
| Au     | 2 ml on a Petri plate                  | 8        | 50        |         | 30       |             | 6.3          | [17] |
| Au     | 2 ml on a Petri plate ( $\phi$ = 4 cm) | 10       | 50        | 420-430 | 30       | 5 and 15    | 5.6±1.9      | [18] |
| Au     | 2 ml on a Petri plate ( $\phi$ = 4 cm) | 10       | 50        | 420-430 | 30       | 5           | 5.6±1.8      | [19] |
| Ag     |                                        | 2        | 50        |         | 30       | 20          | 7.4±3.6      | [20] |

**Table S5:** Sputtering onto pure glycerol.

| Target | Amount of liquid substrate            | $p$ , Pa | $WD$ , mm | $V$ , V | $I$ , mA | $t_s$ , min | NP size (nm) | Ref. |
|--------|---------------------------------------|----------|-----------|---------|----------|-------------|--------------|------|
| Pt     | 5 ml on a Petri plate ( $\phi$ = 4cm) | 4-6      | 50        | 420     | 40       | 5           | 1.7±0.3      | [21] |
| Pd     | 5 ml on a Petri plate ( $\phi$ = 4cm) | 4-6      | 50        | 420     | 40       | 5           | 2.4±0.4      | [21] |
| Au     | 2 ml on a Petri plate ( $\phi$ = 4cm) | 7        | 50        |         | 30       | 5           | 3.5 ±1.5     | [22] |
| Ag     | 2 ml on a Petri plate ( $\phi$ = 4cm) | 7        | 50        |         | 30       | 5           | 3.5 ±2.4     | [22] |

## References

- (1) Tsuda, T.; Kurihara, T.; Hoshino, Y.; Kiyama, T.; Okazaki, K.; Torimoto, T.; Kuwabata, S. *Electrochemistry* **2009**, *77*, 693–695. doi:10.5796/electrochemistry.77.693
- (2) Tsuda, T.; Yoshii, K.; Torimoto, T.; Kuwabata, S. *J. Power Sources* **2010**, *195*, 5980–5985. doi:10.1016/j.jpowsour.2009.11.027
- (3) Suzuki, S.; Suzuki, T.; Tomita, Y.; Hirano, M.; Okazaki, K.; Kuwabata, S.; Torimoto, T. *CrystEngComm* **2012**, *14*, 4922. doi:10.1039/c2ce25235j
- (4) Sugioka, D.; Kameyama, T.; Kuwabata, S.; Torimoto, T. *Phys. Chem. Chem. Phys.* **2015**, *17*, 13150–13159. doi:10.1039/c5cp01602a
- (5) Okazaki, K. I.; Kiyama, T.; Suzuki, T.; Kuwabata, S.; Torimoto, T. *Chem. Lett.* **2009**, *38*, 330–331. doi:10.1246/cl.2009.330
- (6) Khatri, O. P.; Adachi, K.; Murase, K.; Okazaki, K. I.; Torimoto, T.; Tanaka, N.; Kuwabata, S.; Sugimura, H. *Langmuir* **2008**, *24*, 7785–7792. doi:10.1021/la800678m
- (7) Suzuki, S.; Ohta, Y.; Kurimoto, T.; Kuwabata, S.; Torimoto, T. *Phys. Chem. Chem. Phys.* **2011**, *13*, 13585–13593. doi:10.1039/c1cp20814d
- (8) Okazaki, K. I.; Sakuma, J.; Yasui, J. I.; Kuwabata, S.; Hirahara, K.; Tanaka, N.; Torimoto, T. *Chem. Lett.* **2011**, *40*, 84–86. doi:10.1246/cl.2011.84
- (9) Kameyama, T.; Ohno, Y.; Kurimoto, T.; Okazaki, K.; Uematsu, T.; Kuwabata, S.; Torimoto, T. *Phys. Chem. Chem. Phys.* **2010**, *12*, 1804–1811. doi:10.1039/B914230D
- (10) Iimori, T.; Hatakeyama, Y.; Nishikawa, K.; Kato, M.; Ohta, N. *Chem. Phys. Lett.* **2013**, *586*, 100–103. doi:10.1016/j.cplett.2013.09.010
- (11) Okazaki, K.; Kiyama, T.; Hirahara, K.; Tanaka, N.; Kuwabata, S.; Torimoto, T. *Chem. Commun.* **2008**, No. 6, 691–693. doi:10.1039/B714761A
- (12) Meyer, H.; Meischein, M.; Ludwig, A. *ACS Comb. Sci.* **2018**, *20*, 243–250. doi:10.1021/acscombsci.8b00017
- (13) SUZUKI, T.; OKAZAKI, K.; KIYAMA, T.; KUWABATA, S.; TORIMOTO, T. *Electrochemistry* **2009**, *77*, 636–638. doi:10.5796/electrochemistry.77.636
- (14) Oda, Y.; Hirano, K.; Yoshii, K.; Kuwabata, S.; Torimoto, T.; Miura, M. *Chem. Lett.* **2010**, *39*, 1069–1071. doi:10.1246/cl.2010.1069
- (15) Vanecht, E.; Binnemans, K.; Patskovsky, S.; Meunier, M.; Seo, J. W.; Stappers, L.; Fransaer, J. *Phys. Chem. Chem. Phys.* **2012**, *14*, 5662. doi:10.1039/c2cp23677j
- (16) Carette, X.; Debièvre, B.; Cornil, D.; Cornil, J.; Leclère, P.; Maes, B.; Gautier, N.; Gautron, E.; El Mel, A. A.; Raquez, J. M.; Konstantinidis, S. *J. Phys. Chem. C* **2018**, *122*, 26605–26612. doi:10.1021/acs.jpcc.8b06987
- (17) Pišlová, M.; Kalbáčová, M. H.; Vrabcová, L.; Slepíčka, P.; Kolská, Z.; Švorčík, V. *Dig. J. Nanomater. Biostructures* **2018**, *13*, 1035–1044
- (18) Rezníčková, A.; Slavikova, N.; Kolska, Z.; Kolarova, K.; Belinova, T.; Hubalek Kalbacova, M.; Cieslar, M.; Svorcik, V. *Colloids Surfaces A Physicochem. Eng. Asp.* **2019**, *560*, 26–34. doi:10.1016/j.colsurfa.2018.09.083
- (19) Rezníčková, A.; Slepicka, P.; Slavikova, N.; Staszek, M.; Svorcik, V. *Colloids Surfaces A Physicochem. Eng. Asp.* **2017**, *523*, 91–97. doi:10.1016/j.colsurfa.2017.04.005
- (20) Ishida, Y.; Nakabayashi, R.; Matsubara, M.; Yonezawa, T. *New J. Chem.* **2015**, *39*, 4227–4230. doi:10.1039/c5nj00294j
- (21) Staszek, M.; Siegel, J.; Kolářová, K.; Rimpelová, S.; Švorčík, V. *Micro Nano Lett.* **2014**, *9*, 778–781. doi:10.1049/mnl.2014.0345
- (22) Siegel, J.; Kvítek, O.; Ulbrich, P.; Kolská, Z.; Slepíčka, P.; Švorčík, V. *Mater. Lett.* **2012**, *89*, 47–50. doi:10.1016/j.matlet.2012.08.048
